# Supplementary material
Source: PubMed Central journal article supplement (PMC6039240)
Supplement: NIHMS967445-supplement-1.pdf [file NIHMS967445-supplement-1.pdf]

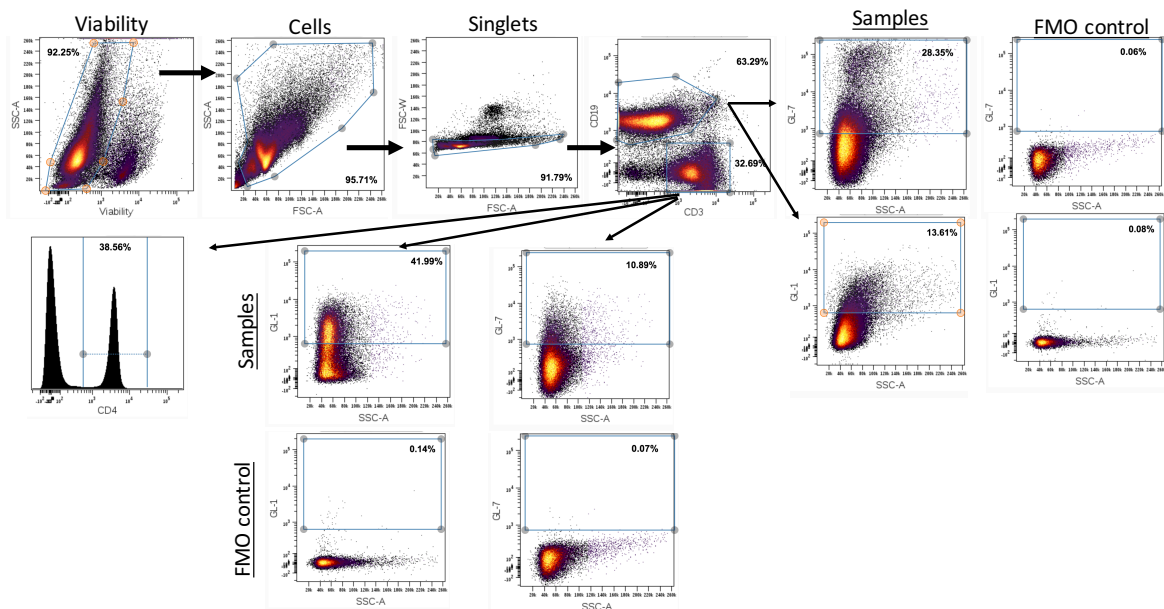

### Supplemental Figure 1 B and T Lymphocyte Gating Strategy

Representative gating strategy used to distinguish activated B and T cells or germinal center T cells and B cells. Also shown are fluorescent minus one controls demonstrating how positive staining was confirmed.
